# Supplementary material for: Droplet detachment force and its relation to Young–Dupre adhesion
Source: Royal Society of Chemistry journal article supplement (doi:10.1039/d3sm01178j), 2023-01-01
Supplement: d3sm01178j1.pdf [file d3sm01178j1.pdf]

# Supporting information for “Droplet detachment force and its relation to Young-Dupre adhesion”

Dan Daniel<sup>\*,†</sup> and Xue Qi Koh<sup>‡</sup>

*†Division of Physical Sciences and Engineering, King Abdullah University of Science and  
Technology (KAUST), Thuwal 23955-6900, Saudi Arabia*

*‡Institute of Materials Research and Engineering, Agency for Science, Technology and  
Research (A\*STAR), Singapore 138634*

E-mail: [danield@kaust.edu.sa](mailto:danield@kaust.edu.sa)

# Analytic solution for detachment force

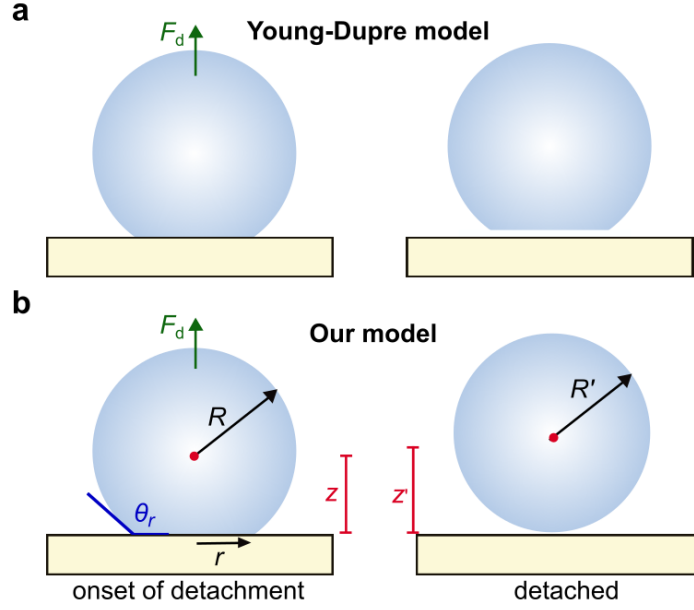

FIG. S1: Droplet detachment in a) Young-Dupre Model and b) our model.

Here, we will derive an expression for the non-dimensional detachment force  $\tilde{F}_d = F_d/\gamma V^{1/3}$  as a power series of  $\epsilon = (1 + \cos \theta_r)$ . Our analytic solution applies for droplets with high contact angles, i.e., where  $\epsilon \ll 1$ .

At the onset of detachment, the droplet geometry can be modelled as a spherical cap of radius  $R$ , with the volume  $V$  and centroid position  $z$  given by

$$\begin{aligned} V &= \frac{\pi}{3} R^3 (2 + \cos \theta_r) (1 - \cos \theta_r)^2 \\ &= \frac{\pi}{3} R^3 (1 + \epsilon) (2 - \epsilon)^2 \end{aligned} \quad (\text{S1})$$

and

$$\begin{aligned} z &= \frac{3R(1 + \cos \theta_r)^2}{4(2 + \cos \theta_r)} - R \cos \theta_r \\ &= \frac{3R\epsilon^2}{4(1 + \epsilon)} - R(\epsilon - 1) \\ &= R \left( 1 - \epsilon + \frac{3\epsilon^2}{4(1 + \epsilon)} \right) \end{aligned} \quad (\text{S2})$$

After detaching, the droplet is now a sphere with radius  $R'$  (which also equivalent to the new centroid position  $z'$ ) and by conservation of volume

$$\begin{aligned}\frac{4}{3}\pi R'^3 &= \frac{\pi}{3}R^3(1+\epsilon)(2-\epsilon)^2 \\ R' &= R\frac{(1+\epsilon)^{1/3}(2-\epsilon)^{2/3}}{4^{1/3}}\end{aligned}\tag{S3}$$

The droplet's centroid position has been raised by an amount  $\delta z$

$$\begin{aligned}\delta z &= z' - z \\ &= R\frac{(1+\epsilon)^{1/3}(2-\epsilon)^{2/3}}{4^{1/3}} - R\left(1 - \epsilon + \frac{3\epsilon^2}{4(1+\epsilon)}\right) \\ &= R\left(\epsilon - \epsilon^2 - \frac{2\epsilon^3}{3} + O(\epsilon^4)\right)\end{aligned}\tag{S4}$$

. There is also an increase in the surface area of the droplet by an amount  $\delta A$ , where

$$\begin{aligned}\delta A &= 4\pi R'^2 - 2\pi R^2(1 - \cos\theta) \\ &= 4\pi R^2\frac{(1+\epsilon)^{2/3}(2-\epsilon)^{4/3}}{4^{2/3}} - 2\pi R^2(2-\epsilon) \\ &= 2\pi R^2\left(\epsilon - \epsilon^2 + \frac{\epsilon^3}{3} + O(\epsilon^4)\right)\end{aligned}\tag{S5}$$

Total change in interfacial energy is given by  $\Delta E_\gamma = \pi r^2(\gamma_s - \gamma_{ls}) + \delta A\gamma$ , where  $\gamma$  is the droplet's surface tension,  $\gamma_s$  is the solid's surface energy, and  $\gamma_{ls}$  is the liquid-solid surface energy. In the Young-Dupre model,  $\delta A = \pi r^2$ . Here, we use the expression in Equation S5 for  $\delta A$  and the relations  $r = R\sin\theta_r$  and  $\gamma_s - \gamma_{ls} = \gamma\cos\theta_r$  to get

$$\begin{aligned}\Delta E_\gamma &= \pi R^2\gamma\sin^2\theta\cos\theta + 2\pi R^2\gamma\left(\epsilon - \epsilon^2 + \frac{\epsilon^3}{3} + O(\epsilon^4)\right) \\ &= \pi R^2\gamma(1 - \cos\theta)(1 + \cos\theta)\cos\theta + 2\pi R^2\gamma\left(\epsilon - \epsilon^2 + \frac{\epsilon^3}{3} + O(\epsilon^4)\right) \\ &= \pi R^2\gamma(-2\epsilon + 3\epsilon^2 - \epsilon^3) + 2\pi R^2\gamma\left(\epsilon - \epsilon^2 + \frac{\epsilon^3}{3} + O(\epsilon^4)\right) \\ &= \pi R^2\gamma\left(\epsilon^2 - \frac{\epsilon^3}{3} + O(\epsilon^4)\right)\end{aligned}\tag{S6}$$

The total change in interfacial energy  $\Delta E_\gamma$  must be equivalent to the work done by the detachment force  $F_d$  over the distance  $\delta z$ , i.e.,

$$\begin{aligned}
F_d \delta z &= \Delta E_\gamma \\
F_d R &= \pi R^2 \gamma \left( \epsilon^2 - \frac{\epsilon^3}{3} + O(\epsilon^4) \right) \left( \epsilon - \epsilon^2 - \frac{2\epsilon^3}{3} + O(\epsilon^4) \right)^{-1} \\
F_d &= \pi R \gamma \left( \epsilon + \frac{2\epsilon^2}{3} + O(\epsilon^3) \right)
\end{aligned} \tag{S7}$$

We can recast Equation S1 to get  $R = (3V/\pi)^{1/3}(1 + \epsilon)^{-1/3}(2 - \epsilon)^{-2/3}$  and substituting this to Equation S7 to get

$$\begin{aligned}
F_d &= \pi \left( \frac{3V}{\pi} \right)^{1/3} \gamma \left( \frac{\epsilon}{2^{2/3}} + O(\epsilon^2) \right) \\
\frac{F_d}{\gamma V^{1/3}} &= \left( \frac{\pi}{2} \right)^{2/3} 3^{1/3} \epsilon + O(\epsilon^2) \\
\tilde{F}_d &\approx \left( \frac{\pi}{2} \right)^{2/3} 3^{1/3} (1 + \cos \theta) \\
&\approx 1.95(1 + \cos \theta)
\end{aligned} \tag{S8}$$

## Comparison between simulation and analytic results

Table S1: Comparison between simulation and analytic results. Body and surface  $\tilde{F}_d$  values are obtained numerically by solving Young-Laplace equation, while analytic  $\tilde{F}_d$  is calculated using Equation 5 in the main text. For  $\theta > 140^\circ$ ,  $\tilde{F}_d$  values for all three simulation and analytic models are very close to one another (coloured cells).

| $\theta$ | $1 + \cos \theta$ | Body $\tilde{F}_d$ | Surface $\tilde{F}_d$ | Analytic $\tilde{F}_d$ . |
|----------|-------------------|--------------------|-----------------------|--------------------------|
| 40°      | 1.77              | 5.31               | 1.56                  | 3.44                     |
| 50°      | 1.64              | 4.66               | 1.46                  | 3.20                     |
| 60°      | 1.50              | 4.01               | 1.37                  | 2.92                     |
| 70°      | 1.34              | 3.39               | 1.37                  | 2.62                     |
| 80°      | 1.17              | 2.80               | 1.35                  | 2.28                     |
| 90°      | 1                 | 2.26               | 1.19                  | 1.95                     |
| 100°     | 0.83              | 2.80               | 1.35                  | 2.28                     |
| 110°     | 0.66              | 1.38               | 0.93                  | 1.28                     |
| 120°     | 0.5               | 1.02               | 0.76                  | 0.97                     |
| 130°     | 0.36              | 0.72               | 0.63                  | 0.70                     |
| 140°     | 0.23              | 0.46               | 0.39                  | 0.46                     |
| 150°     | 0.13              | 0.26               | 0.22                  | 0.26                     |
| 155°     | 0.093             | 0.18               | 0.18                  | 0.18                     |
| 160°     | 0.060             | 0.116              | 0.116                 | 0.118                    |
| 165°     | 0.034             | 0.066              | 0.067                 | 0.066                    |
| 170°     | 0.015             | 0.0295             | 0.0302                | 0.0296                   |
| 175°     | 0.0038            | 0.0079             | 0.0077                | 0.0074                   |
